# Supplementary material for: Distinct impacts of the El Niño–Southern Oscillation and Indian Ocean Dipole on China's gross primary production
Source: Copernicus journal article supplement (doi:10.5194/bg-21-5027-2024), 2024-11-15
Supplement: Supplementary file 1 [file bg-21-5027-2024-supplement.pdf]

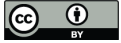

*Supplement of*

## **Distinct impacts of the El Niño–Southern Oscillation and Indian Ocean Dipole on China’s gross primary production**

**Ran Yan et al.**

*Correspondence to:* Jun Wang ([wangjun@nju.edu.cn](mailto:wangjun@nju.edu.cn)) and Weimin Ju ([juweimin@nju.edu.cn](mailto:juweimin@nju.edu.cn))

The copyright of individual parts of the supplement might differ from the article licence.

19 **Method**

20 Building on the methodology introduced by Ahlstrom et al. [2015], we incorporate an index that  
21 evaluates individual geographic locations based on their consistency, over time, in mirroring the sign  
22 and magnitude of the national GPP. For each geographical division  $j$ , its contribution to the national  
23 GPP anomaly is defined as:

24 
$$f_j = \frac{\sum_t \frac{x_{jt} |X_t|}{X_t}}{\sum_t |X_t|}$$

25 where  $x_{jt}$  is the GPP anomaly for region  $j$  at season  $t$  (SON(y0), DJF(y0), MAM(y1) and JJA(y1)),  
26 and  $X_t$  is the national GPP anomaly, such that  $X_t = \sum_t x_{jt}$ . By this definition  $f_j$  is the average relative  
27 anomaly  $x_{jt}/X_t$  for region  $j$ , weighted with the absolute national anomaly  $|X_t|$ .

28

29 Table S1. Information for the 7 sites used for verification. Where, P represents average annual  
30 precipitation, T represents average annual temperature, and PFT represents plant functional  
31 types.

| <b>Site Name</b>      | <b>Lat (°N)</b> | <b>Lon (°E)</b> | <b>P (mm)</b> | <b>T (°C)</b> | <b>PFT</b> | <b>years</b> |
|-----------------------|-----------------|-----------------|---------------|---------------|------------|--------------|
| Xishuangbanna<br>(BN) | 21.93           | 101.27          | 737.1         | 19.40         | Forest     | 2003~2010    |
| Qianyanzhou<br>(QYZ)  | 26.74           | 115.06          | 583.70        | 17.74         | Forest     | 2003~2010    |
| Changbaishan<br>(CB)  | 42.40           | 128.10          | 234.33        | 3.65          | Forest     | 2003~2010    |
| Dinghushan<br>(DHS)   | 23.17           | 112.53          | 729.09        | 20.12         | Forest     | 2003~2010    |
| Haibei Shrub<br>(HBS) | 37.67           | 101.33          | 236.33        | -1.26         | Shrub      | 2003~2010    |
| Dangxiong<br>(DX)     | 30.50           | 91.07           | 220.85        | 2.72          | Grass      | 2004~2010    |
| Yingke<br>(YK)        | 38.85           | 100.42          | 31.71         | 7.40          | Crop       | 2008~2010    |

32

33

34 Table S2. Contributions of different regions to the national GPP changes in different events.

|         | Southern | Northern | Northwest | TP     |
|---------|----------|----------|-----------|--------|
| El Niño | 59.58%   | 27.29%   | 4.47%     | 8.66%  |
| La Niña | 76.21%   | 27.96%   | 0.46%     | -4.64% |
| pIOD    | 53.65%   | 31.67%   | 6.88%     | 7.79%  |
| nIOD    | 37.25%   | 46.99%   | 7.48%     | 8.28%  |

35

36

37 Table S3. Total GPP anomaly ( $\text{Tg C yr}^{-1}$ ) at the provincial scale for different events. The province names  
 38 are abbreviated and sorted alphabetically.

| Province       | El Niño | La Niña | pIOD   | nIOD   |
|----------------|---------|---------|--------|--------|
| Anhui          | -2.25   | 4.41    | -1.72  | 3.39   |
| Beijing        | 0.16    | -0.15   | 0.09   | -0.21  |
| Chongqing      | 2.31    | -0.03   | 0.58   | -0.58  |
| Fujian         | -0.49   | 1.62    | -22.00 | 5.36   |
| Gansu          | 0.05    | -0.33   | 4.00   | -3.36  |
| Guangdong      | 4.17    | -2.30   | -19.58 | 2.80   |
| Guangxi        | 0.05    | -2.31   | -23.22 | -0.33  |
| Guizhou        | -2.05   | 0.94    | -6.42  | -0.55  |
| Hainan         | -0.64   | 0.87    | -6.62  | 2.18   |
| Hebei          | -2.98   | 0.24    | 4.62   | -1.64  |
| Henan          | 0.17    | 2.62    | 12.80  | 2.53   |
| Heilongjiang   | 1.54    | -5.13   | 11.18  | -1.18  |
| Hubei          | -0.99   | -0.15   | -12.83 | 2.76   |
| Hunan          | 1.23    | 0.70    | -1.72  | 0.45   |
| Jilin          | -0.31   | 0.36    | -0.97  | -1.54  |
| Jiangsu        | -2.64   | 1.71    | 2.77   | -0.54  |
| Jiangxi        | -2.24   | 2.24    | -32.74 | 4.31   |
| Liaoning       | -2.27   | 3.67    | -3.47  | -2.18  |
| Inner Mongolia | -5.77   | 6.29    | -5.97  | -12.18 |
| Ningxia        | 0.08    | -0.01   | 0.11   | -0.43  |
| Qinghai        | 0.21    | -0.80   | -2.02  | -2.96  |
| Shandong       | -3.68   | 1.67    | 6.37   | 1.12   |
| Shanxi         | 1.05    | 1.86    | 7.85   | -1.69  |
| Shaanxi        | 5.48    | -0.85   | 10.05  | -2.63  |
| Sichuan        | -4.22   | -2.45   | 7.14   | -3.34  |
| Taiwan         | -0.47   | 0.66    | -1.18  | 0.65   |
| Tianjin        | -0.23   | -0.09   | -0.18  | -0.13  |
| Tibet          | -2.50   | -1.31   | 6.13   | 3.05   |
| Xinjiang       | 3.82    | -4.37   | -1.46  | 2.25   |
| Yunnan         | -22.55  | 3.62    | -28.20 | 12.04  |
| Zhejiang       | -0.84   | 1.05    | -2.91  | 1.62   |

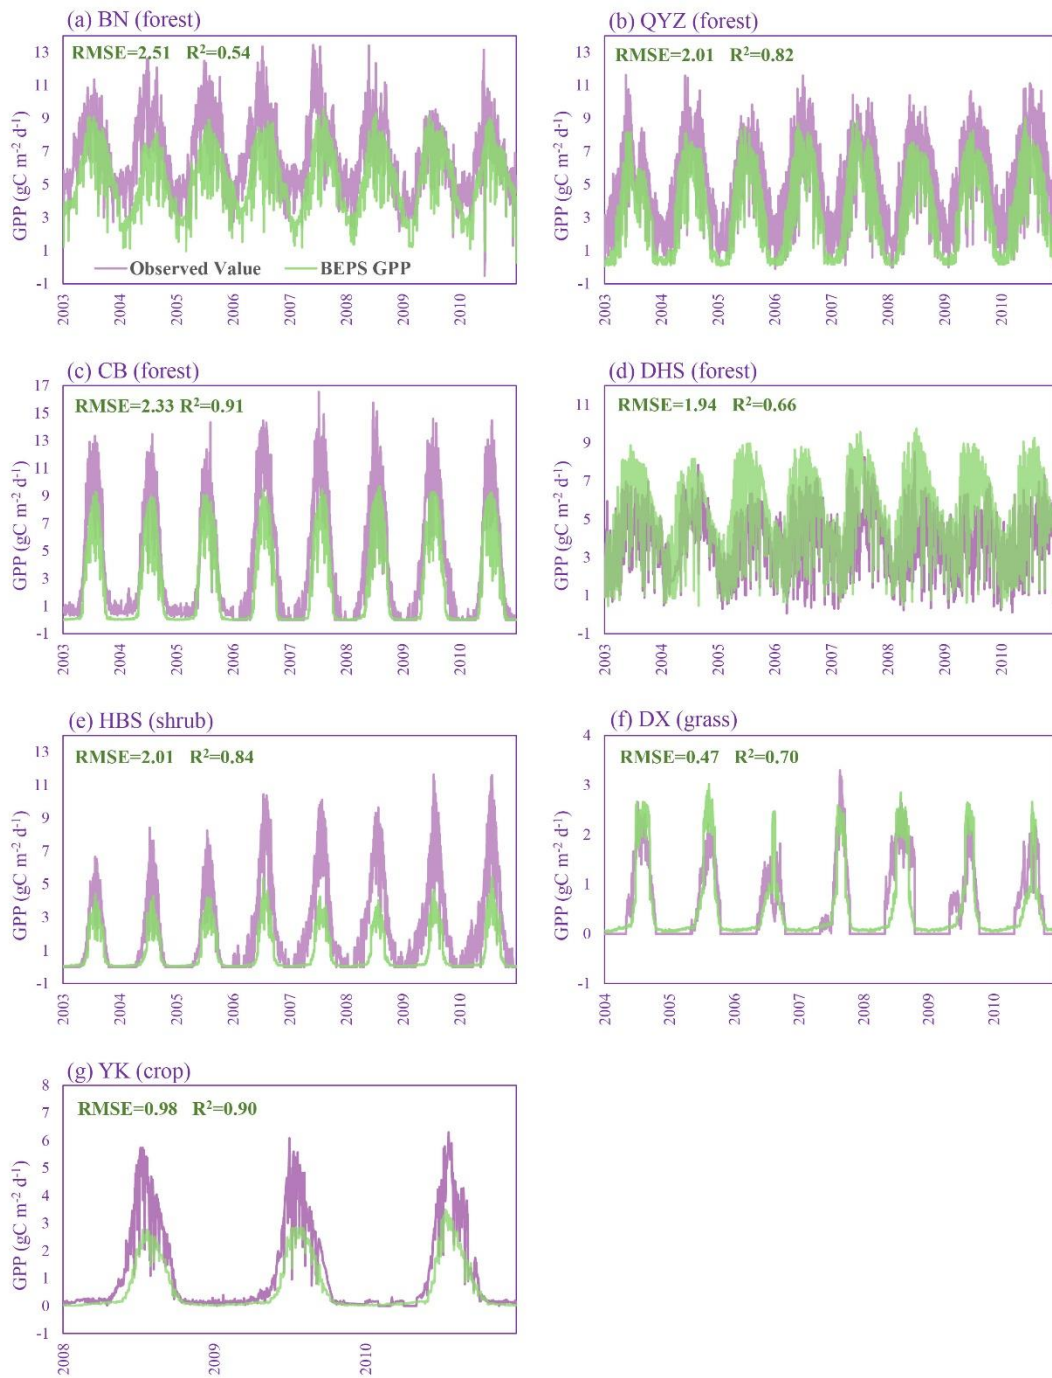

40

41

Fig. S1. Comparison between BEPS simulated and Flux Tower observed daily GPP at 7 sites.

42

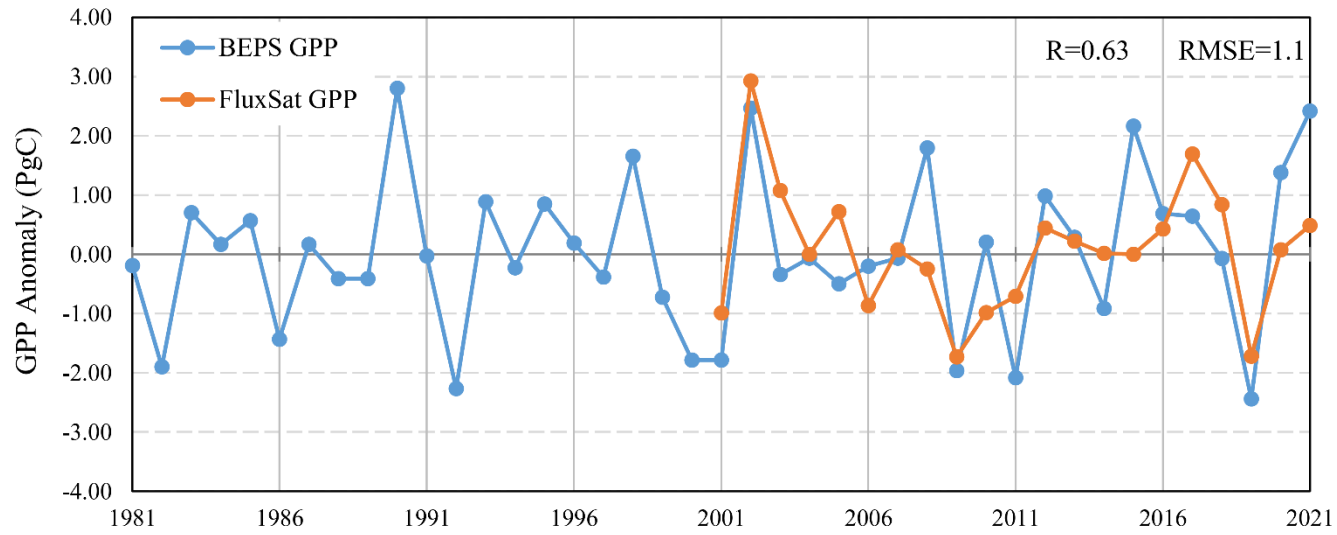

43

44 Fig. S2. Total annual gross primary productivity (GPP) anomalies in the Boreal Ecosystem Productivity Simulator (BEPS) model and FluxSat data from 1981 to 2021.

45

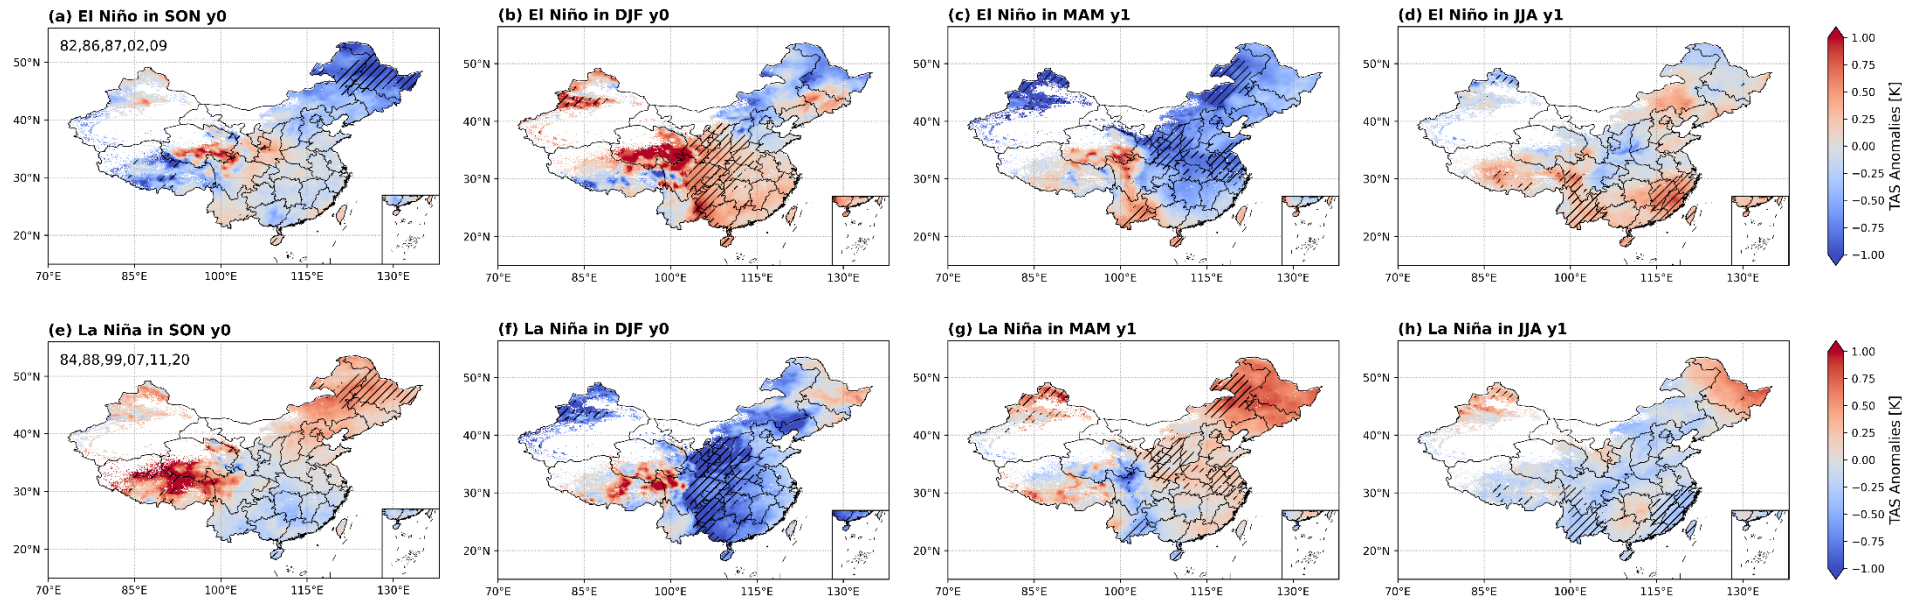

46

47 Fig. S3. Spatial distributions of seasonal composite surface air temperature (TAS) anomalies for ENSO events. The black slashes indicate areas where El Niño events  
 48 differ significantly from La Niña events ( $p \leq 0.05$ ) based on the Student's two-sample  $t$ -test. Numbers in subplots (first column) denote the years for composite analysis.



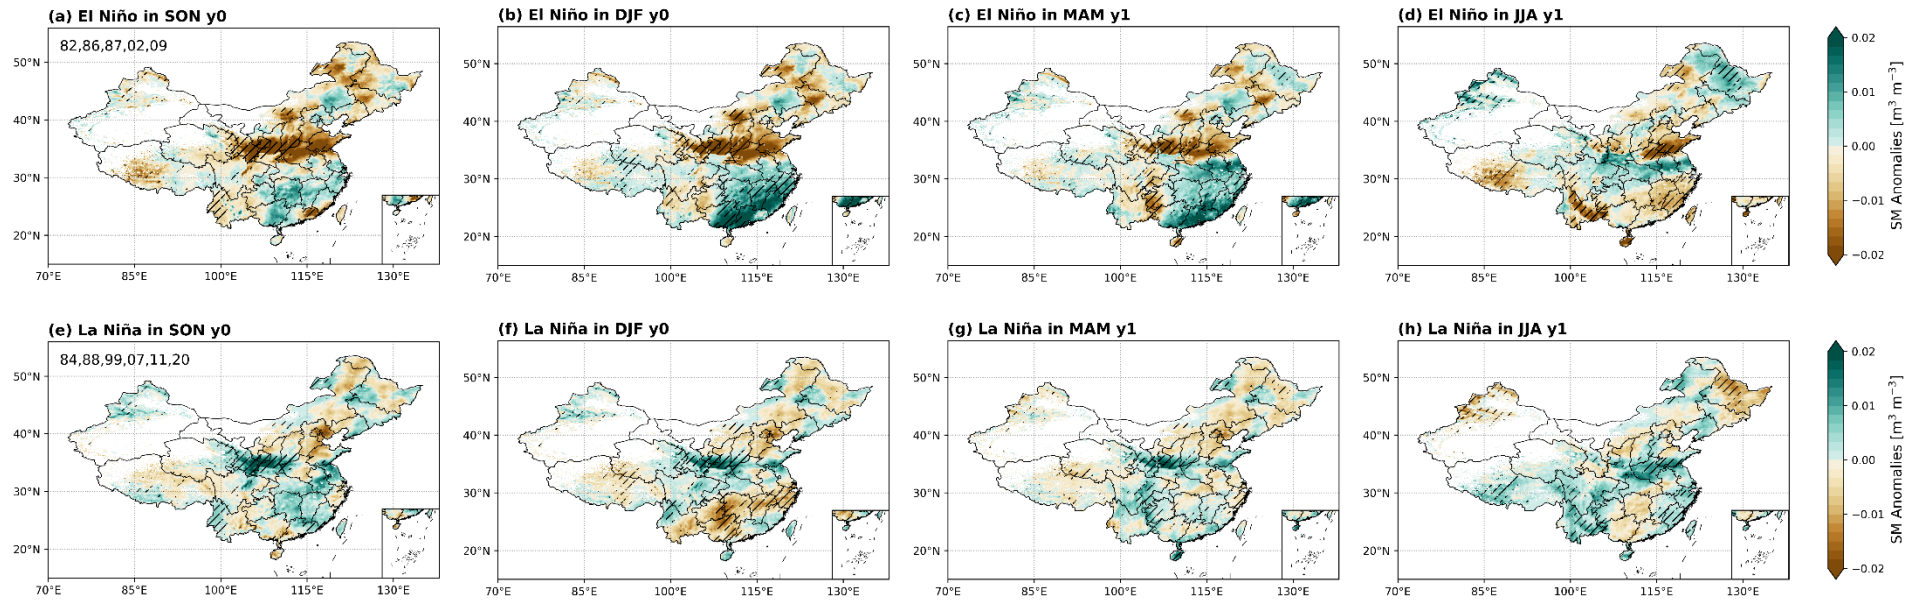

49

50 Fig. S4. Same as Fig. S2, but for soil moisture (SM).

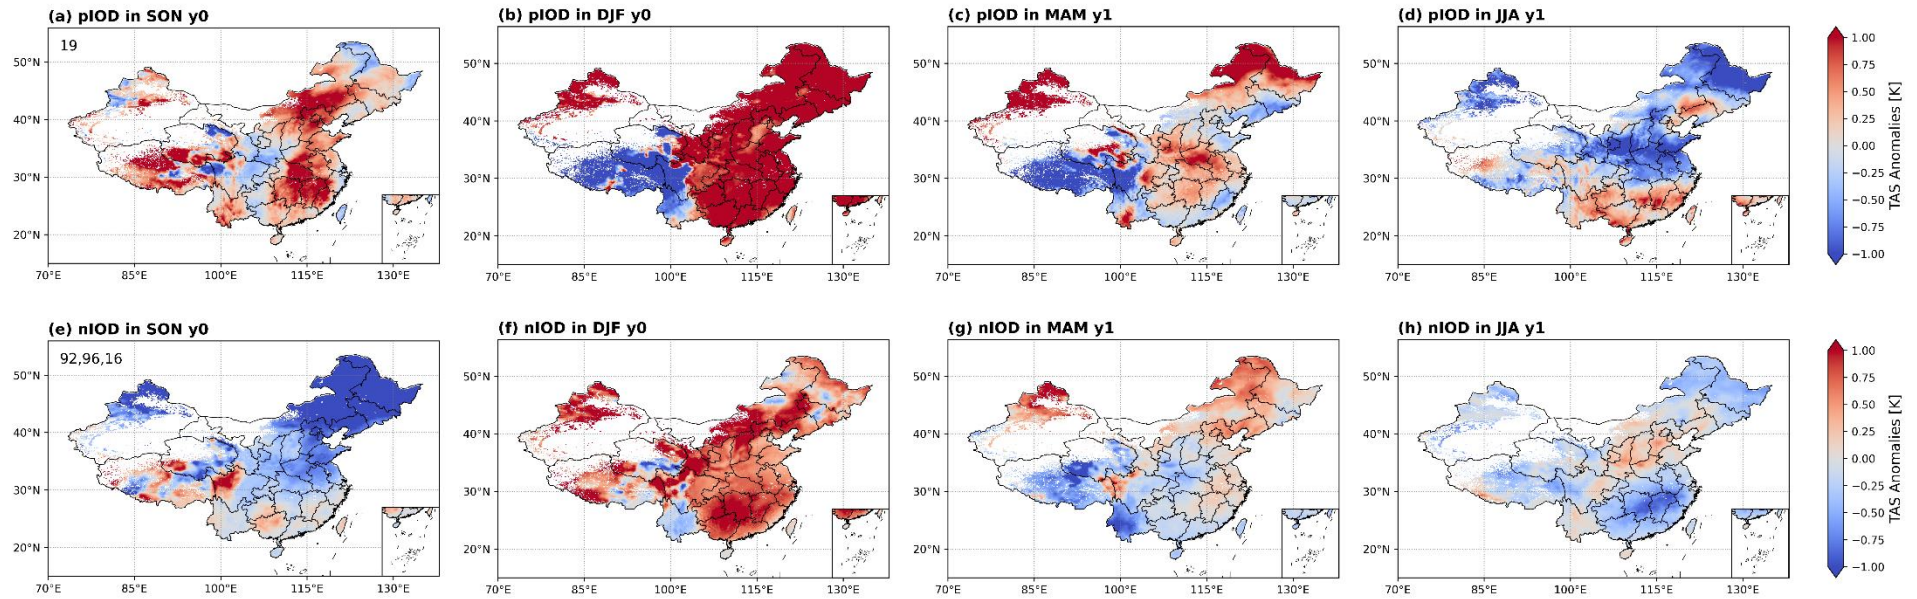

51

52 Fig. S5. Spatial distributions of seasonal composite TAS anomalies for IOD events. Numbers in subplots (first column) denote the years for composite analysis.

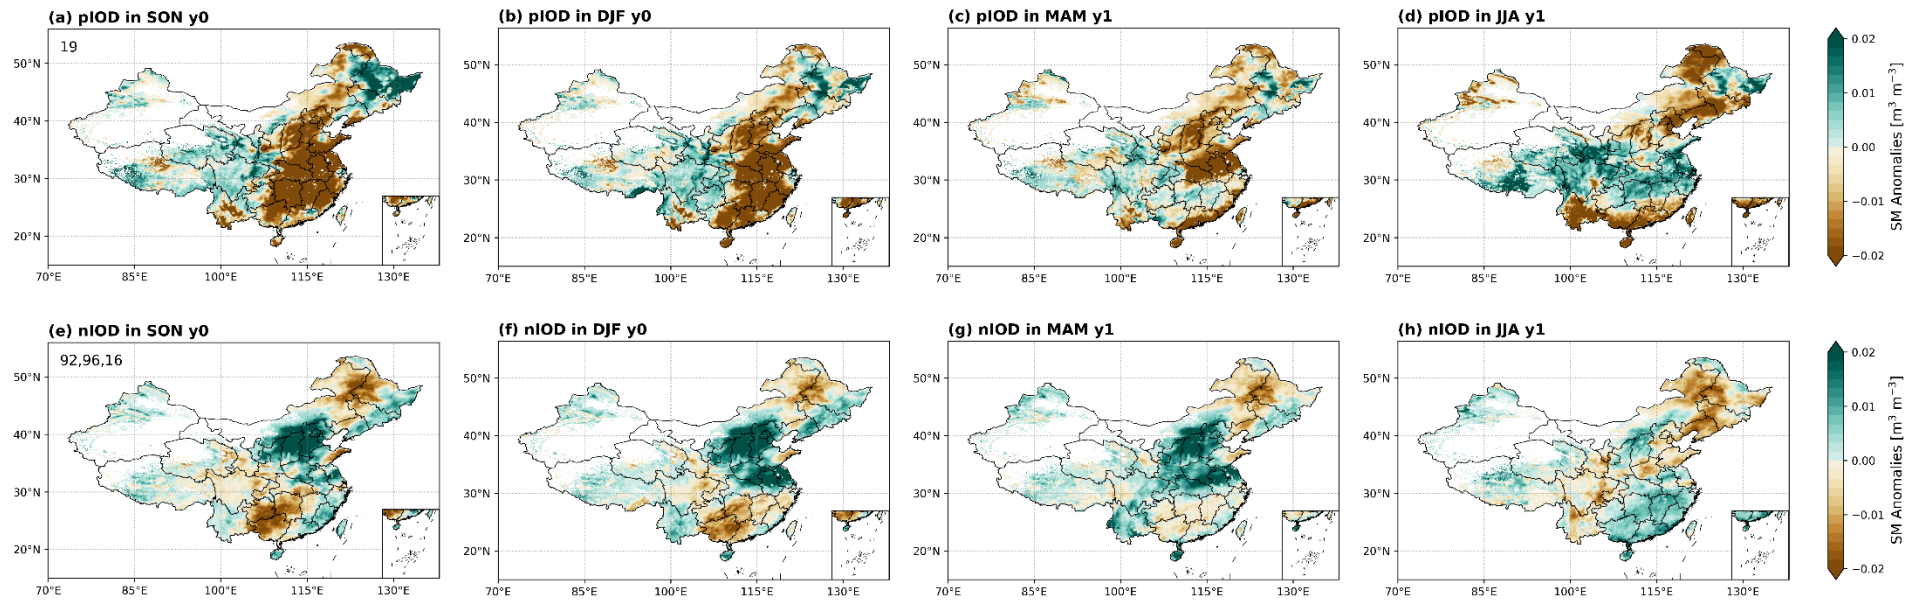

53

54 Fig. S6. Same as Fig. S4, but for SM.

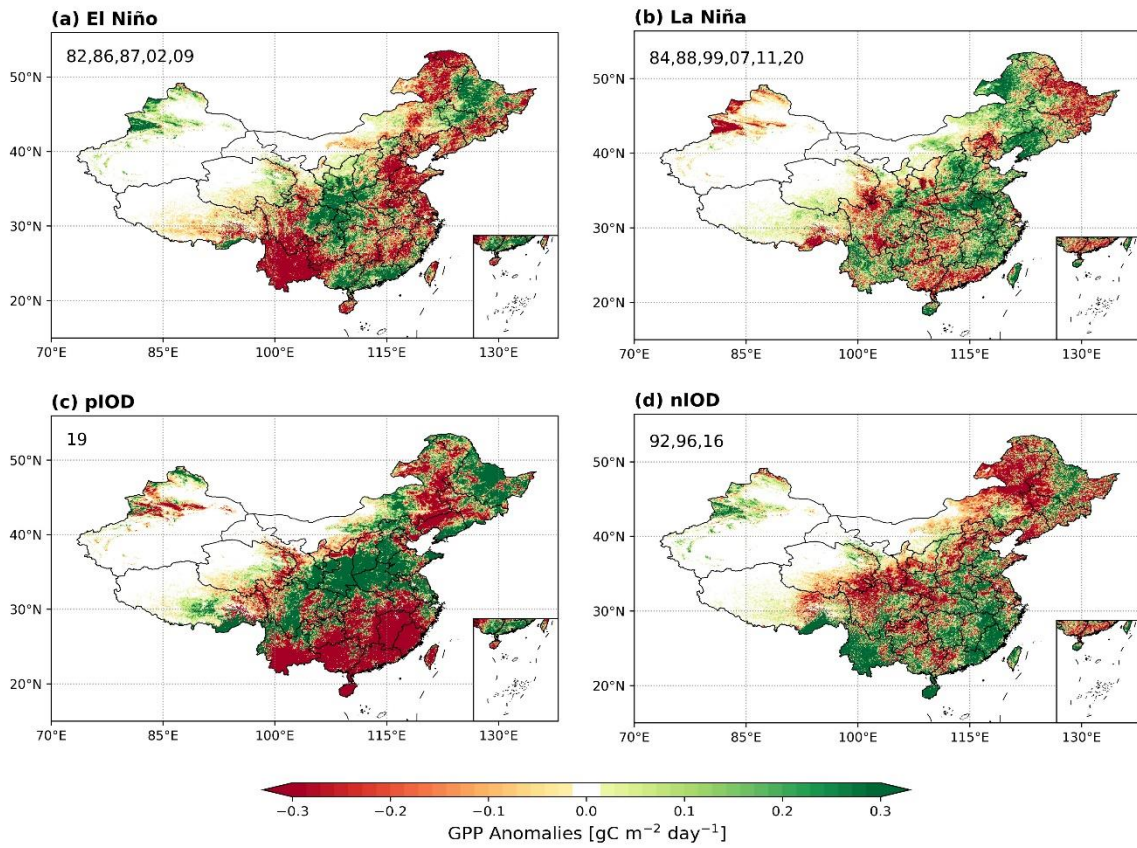

55

56 Fig. S7. Spatial distributions of annual total composite GPP anomalies for different event classes. Numbers in  
 57 subplots denote the years for composite analysis.

58

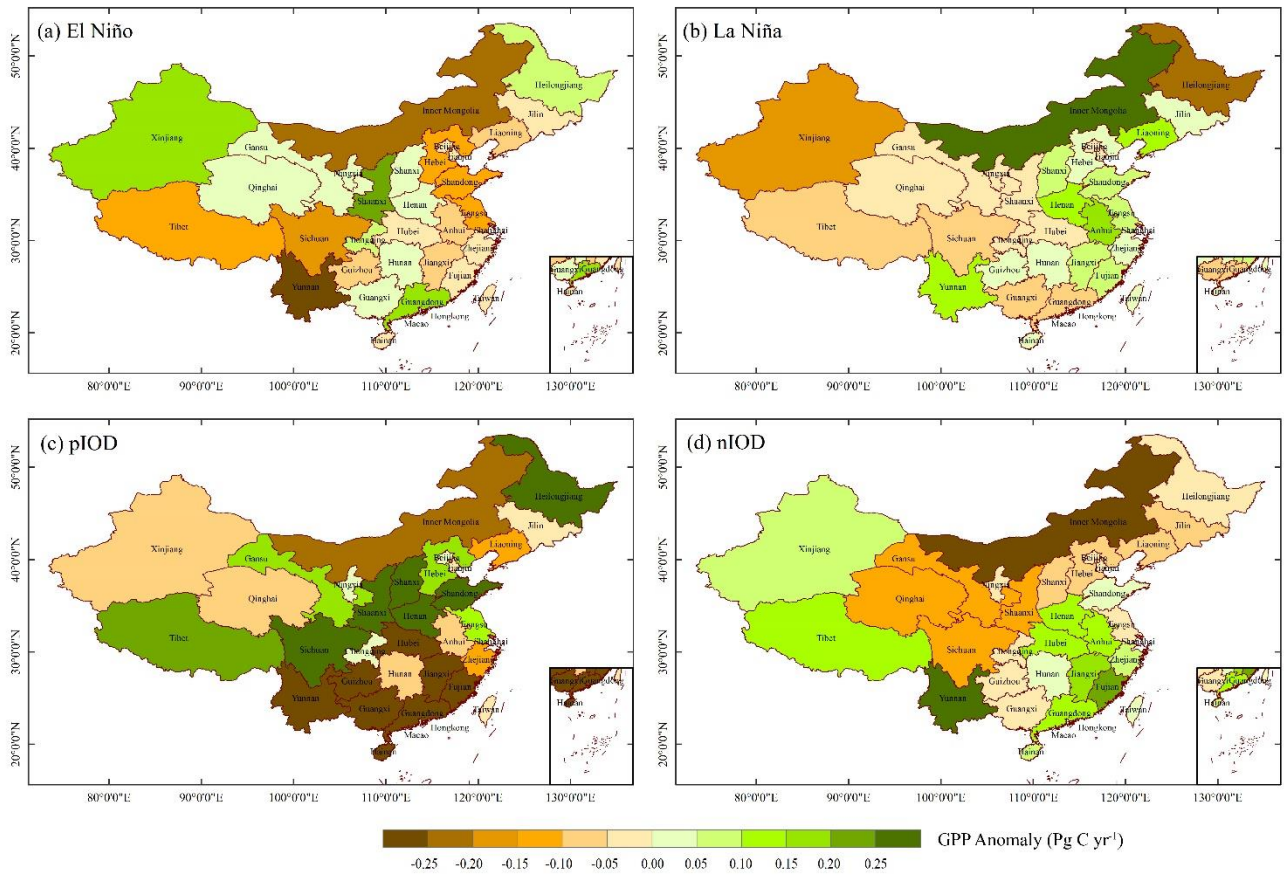

59

60 Fig. S8. Spatial distributions of total composite GPP anomalies ( $\text{Pg C yr}^{-1}$ ) at the provincial scale for different  
 61 classified events.

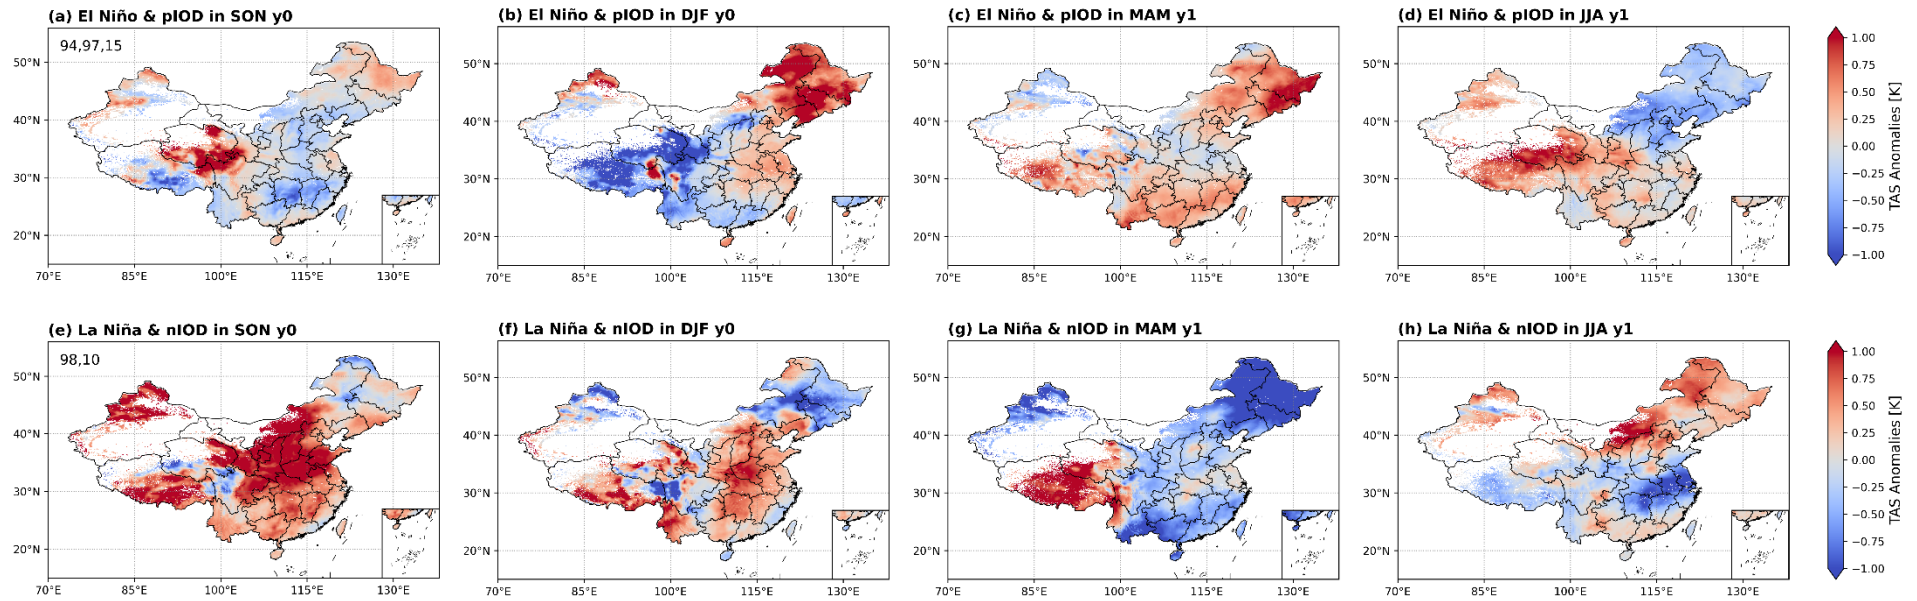

62

63 Fig. S9. Spatial distributions of seasonal composite TAS anomalies for compound events. Numbers in subplots (first column) denote the years for composite analysis.

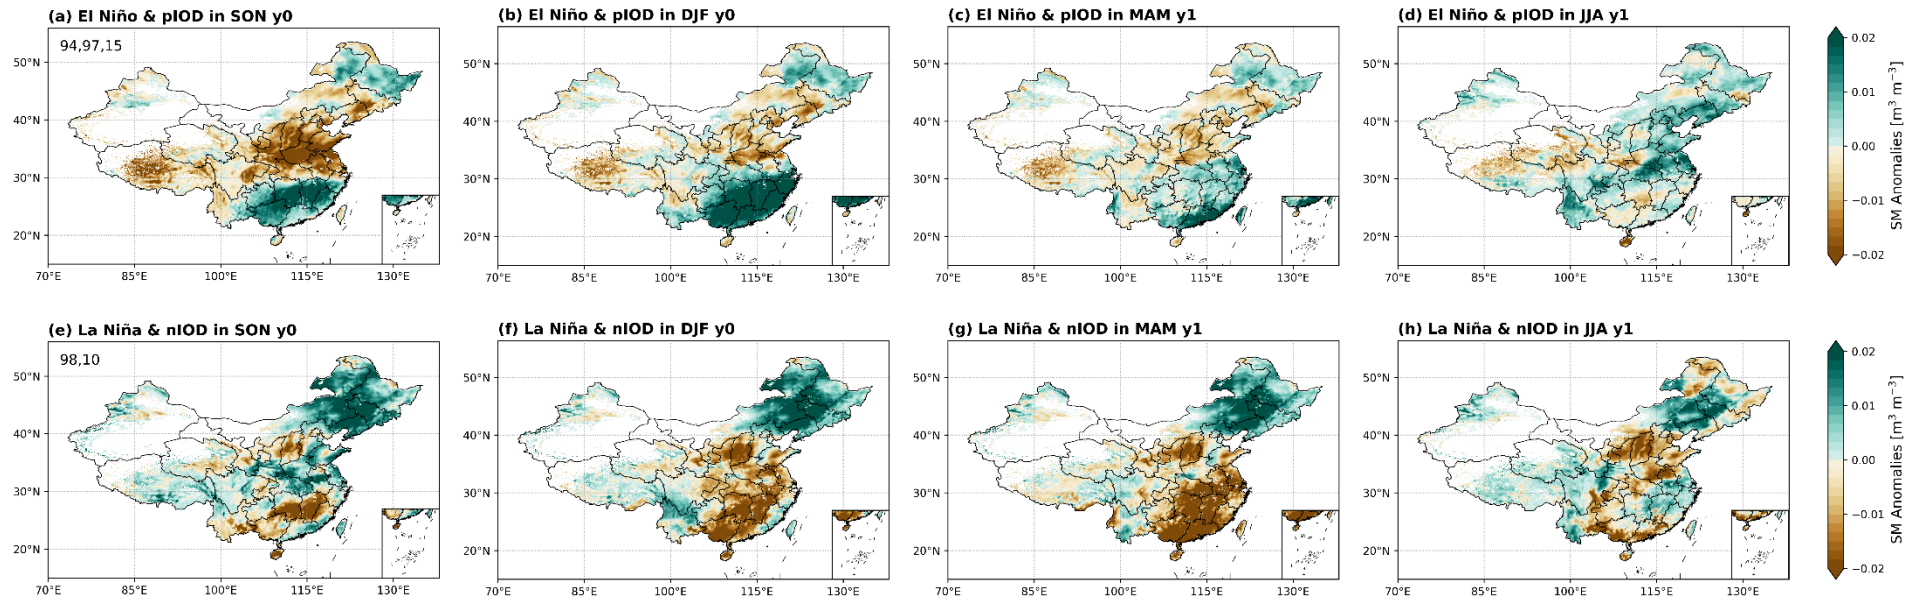

64

65 Fig. S10. Same as Fig. S8, but for SM.

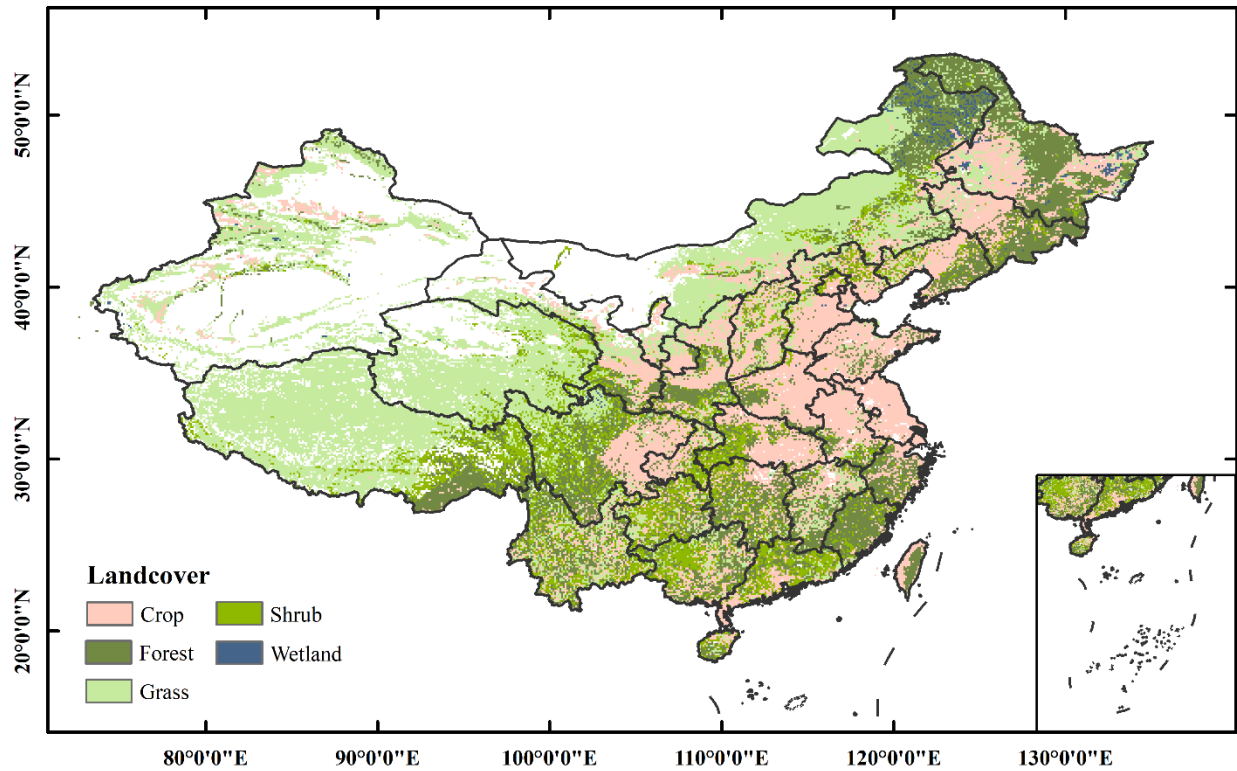

66

67 Fig. S11. Geographical distributions of landcover classes, based on the 1:1 000 000 Atlas of vegetation in China  
 68 (<https://www.resdc.cn/data.aspx?DATAID=122>). In this study, the data were resampled to  $0.1^{\circ} \times 0.1^{\circ}$  using the  
 69 area maximization method. Specifically, forest contains its needleleaf forests, broadleaf forests and mixed  
 70 forests; grass contains grassland, grass, and meadow; crop refers to cultivated vegetation, including crops and  
 71 artificial orchards and economic forests.

72



73 **Reference**

- 74 Ahlstrom, A., et al. (2015), The dominant role of semi-arid ecosystems in the trend and variability of the land  
75 CO<sub>2</sub> sink, *Science*, 348(6237), 895-899, <https://doi:10.1126/science.aaa1668>.
